# Supplementary material
Source: PubMed Central journal article supplement (PMC9799240)

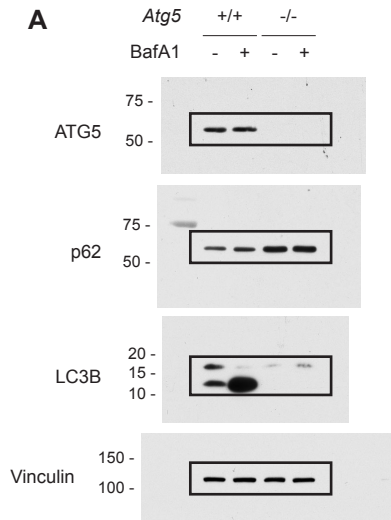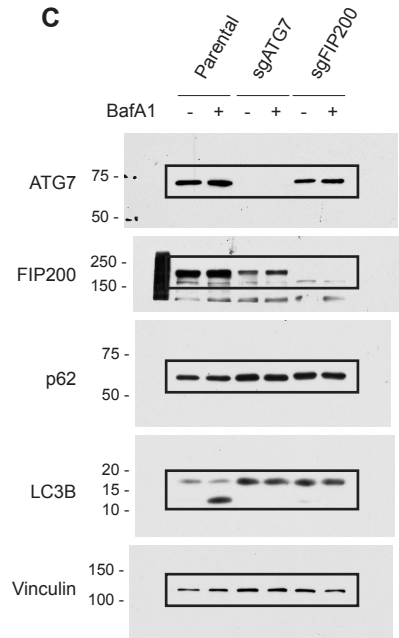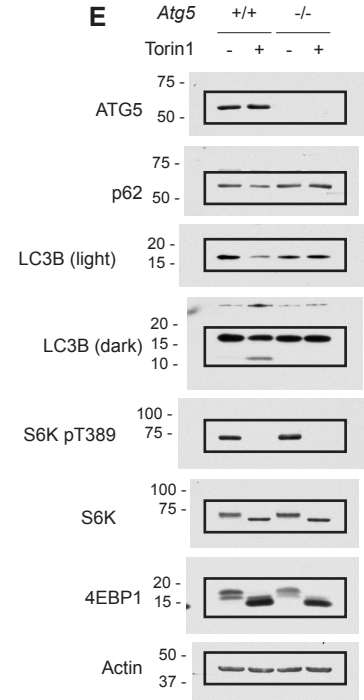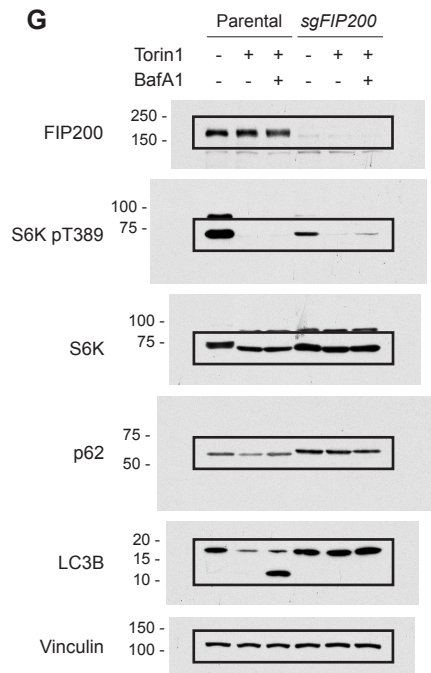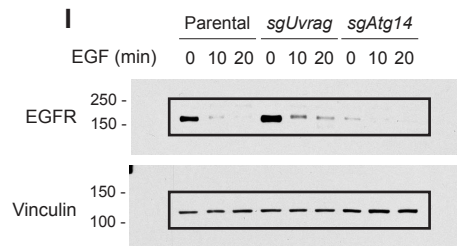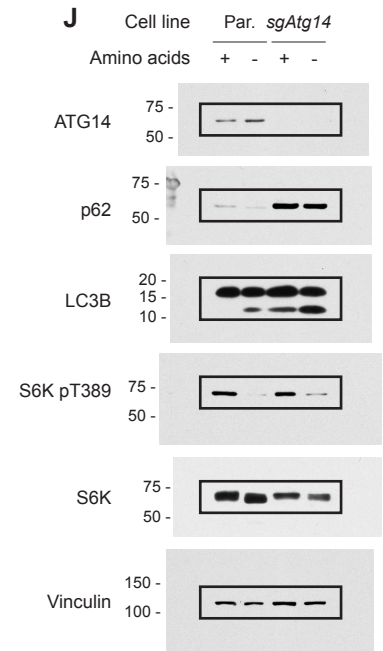

Supplement: NIHMS1855215-supplement-1855215_SD_ED_Fig_7_unprocessed_WB.pdf [file NIHMS1855215-supplement-1855215_SD_ED_Fig_7_unprocessed_WB.pdf]
